# Supplementary material for: The minimal amount of starting DNA for Agilent’s hybrid capture-based targeted massively parallel sequencing
Source: PubMed Central journal article supplement (PMC4879621; doi:10.1038/srep26732), 2016-05-25
Supplement: srep26732-s1.pdf [file srep26732-s1.pdf]

## The minimal amount of starting DNA for Agilent's hybrid capture-based targeted massively parallel sequencing

Jongsuk Chung<sup>1,2,3#</sup>, Dae-Soon Son<sup>1,2#</sup>, Hyo-Jeong Jeon<sup>2#</sup>, Kyoung-Mee Kim<sup>4</sup>, Gahee Park<sup>2</sup>, Gyu Ha Ryu<sup>5</sup>, Woong-Yang Park<sup>2,3\*</sup>, Donghyun Park<sup>1,2\*</sup>

<sup>1</sup> Samsung Biomedical Research Institute, Samsung Advanced Institute of Technology, Samsung Electronics Co. Ltd., Seoul 06351, Korea

<sup>2</sup> Samsung Genome Institute, Samsung Medical Center, Seoul 06351, Korea

<sup>3</sup>Department of Molecular Cell Biology, Sungkyunkwan University School of Medicine, Suwon 16419, Korea

<sup>4</sup>Department of Pathology and Translational Genomics, Sungkyunkwan University School of Medicine, Suwon 16419, Korea

<sup>5</sup>Office of Research and Development Strategy & Planning, Samsung Medical Center, Seoul 06351, Korea

# These authors contributed equally to this work.

\* To whom correspondence should be addressed

Woong-Yang Park

E-mail: [woongyang.park@samsung.com](mailto:woongyang.park@samsung.com)

Tel: +82 2 3410 6128

Fax: +82 2 2148 9819

Donghyun Park

E-mail: [dh0307.park@samsung.com](mailto:dh0307.park@samsung.com)

Tel: +82 2 3410 2954

Fax: +82 2 2148 9819

## SUPPLEMENTARY INFORMATION

Supplementary Figures S1–5

Supplementary Tables S1–7

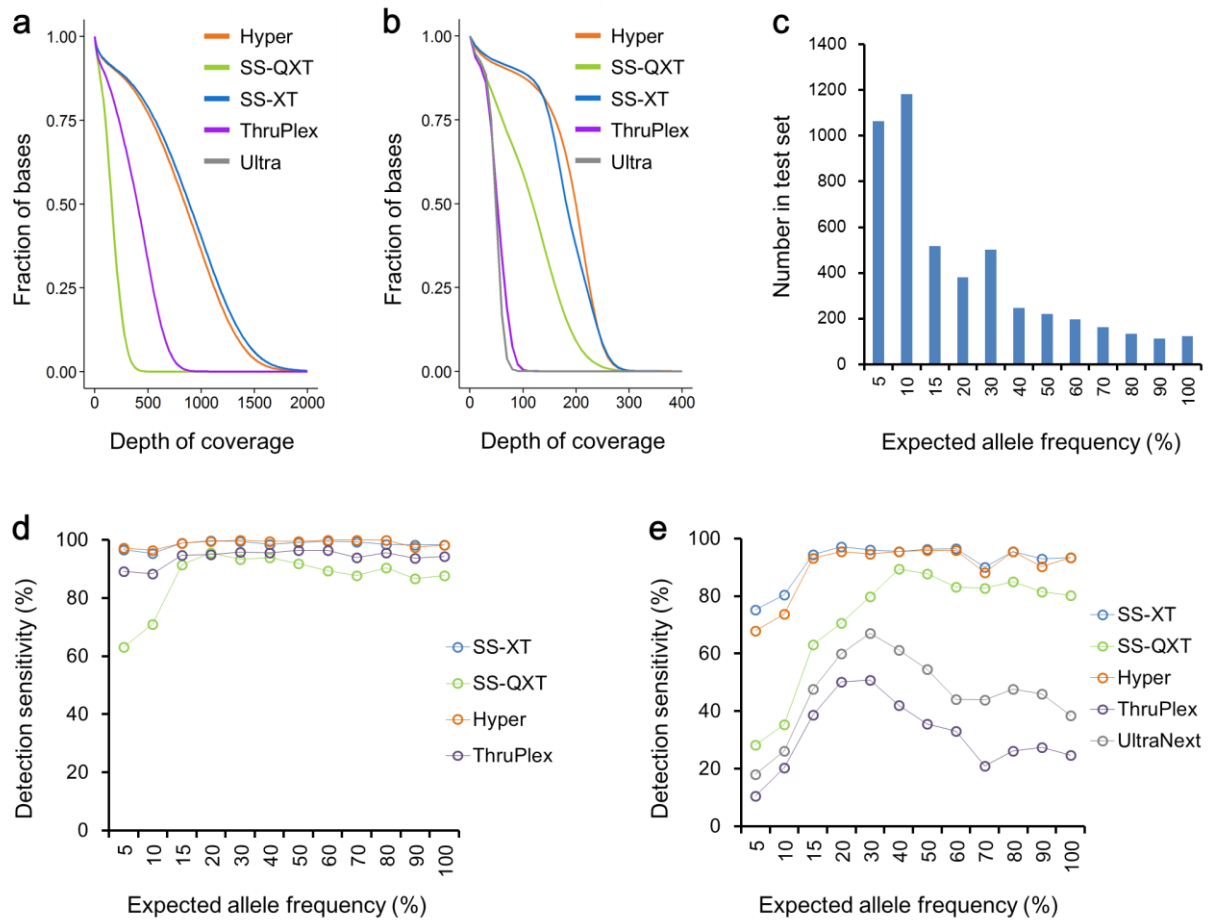

**Supplementary Figure S1** Comparison of kits using HapMap cell line DNA. **(a, b)** Coverage efficiency comparison. Libraries were constructed using 200 ng **(a)** or 10 ng **(b)** of input DNA. Coverage efficiency was visualized as the percent of the total targeted bases covered at particular depths. Data was averaged from two sets of libraries from two HapMap cell-line pools. **(c)** Expected allele frequencies of base substitution alterations within the test set, the pool of 10 HapMap cell lines. **(d, e)** Base substitution detection sensitivity of libraries using 200 ng **(d)** or 10 ng **(e)** of input DNA was plotted against expected allele frequencies of base substitution alterations (x-axis).

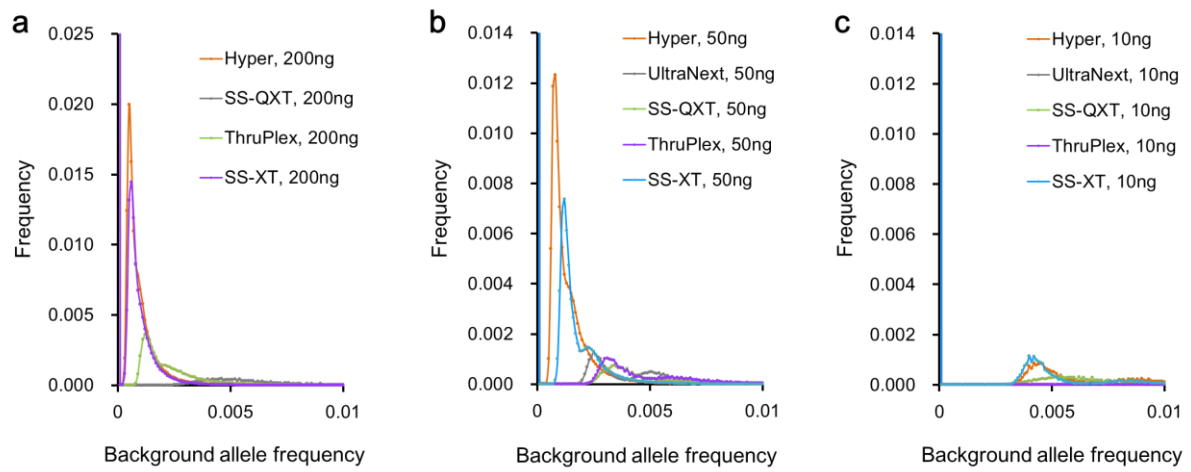

**Supplementary Figure S2** Analysis of background error rate. Libraries were constructed by using 200 ng (a), 50 ng (b), and 10 ng (c) of input DNA from the pool of 10 HapMap cell lines. The x-axis denotes the frequency of background alleles, and the y-axis denotes the fraction of alleles with the background rate designated on the x-axis. Details are given in Materials and Methods.

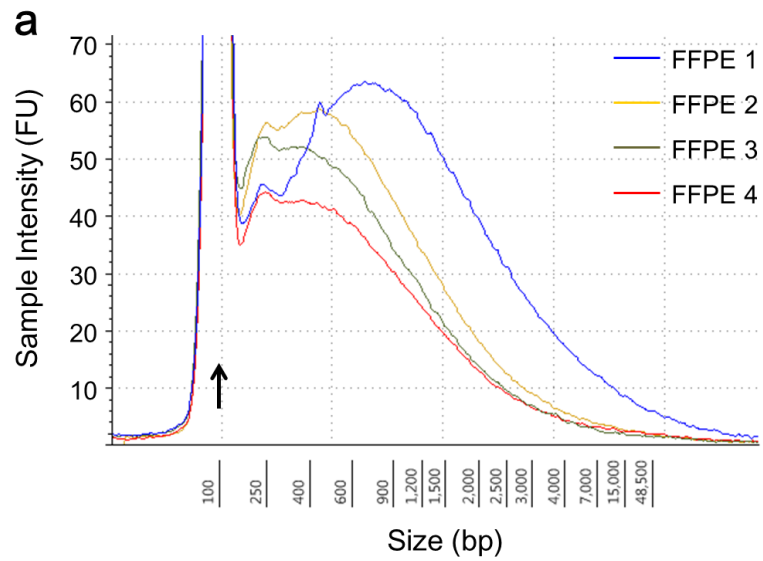

**b**

|                  | FFPE 1 | FFPE 2 | FFPE 3 | FFPE 4 |
|------------------|--------|--------|--------|--------|
| Median size (bp) | 695    | 439    | 247    | 262    |
| qPCR $\Delta Cq$ | 0.8    | 2.0    | 2.8    | 4.3    |

**Supplementary Figure S3** Quality estimation of DNAs from four FFPE samples. (a) The distribution of fragment size was measured by Agilent 2200 TapeStation. (b) Median fragment sizes based on fragment size distribution and qPCR results from Illumina FFPE QC assay were summarized. The manufacturer recommended that samples with  $\Delta Cq$  values below or equal to 2 were adequate for subsequent processes.

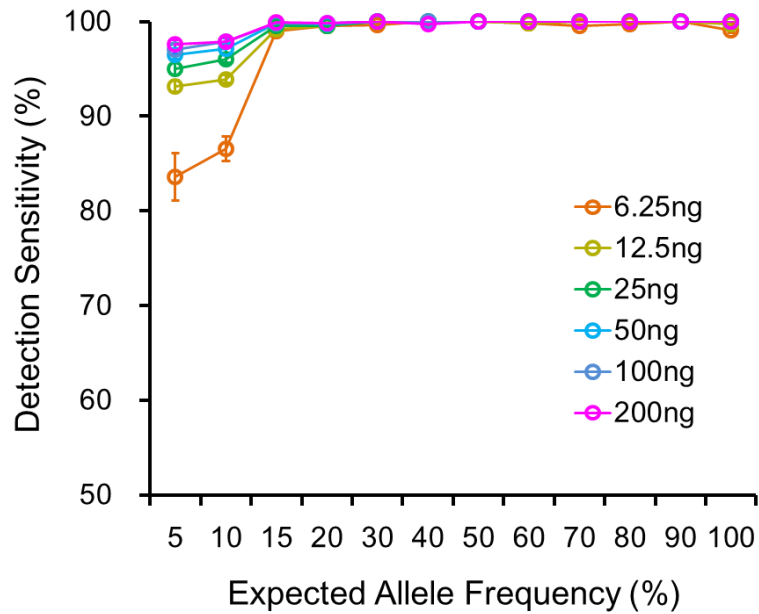

**Supplementary Figure S4** Base substitution detection sensitivity after removal of regions with low coverage bias. Base substitution detection sensitivity of libraries was plotted against expected allele frequencies of base substitution alterations (x-axis). Target regions showing below 200× mean coverage calculated from 22 samples were removed. Values are expressed as mean ± s.e.m. (n = 3 or 4).

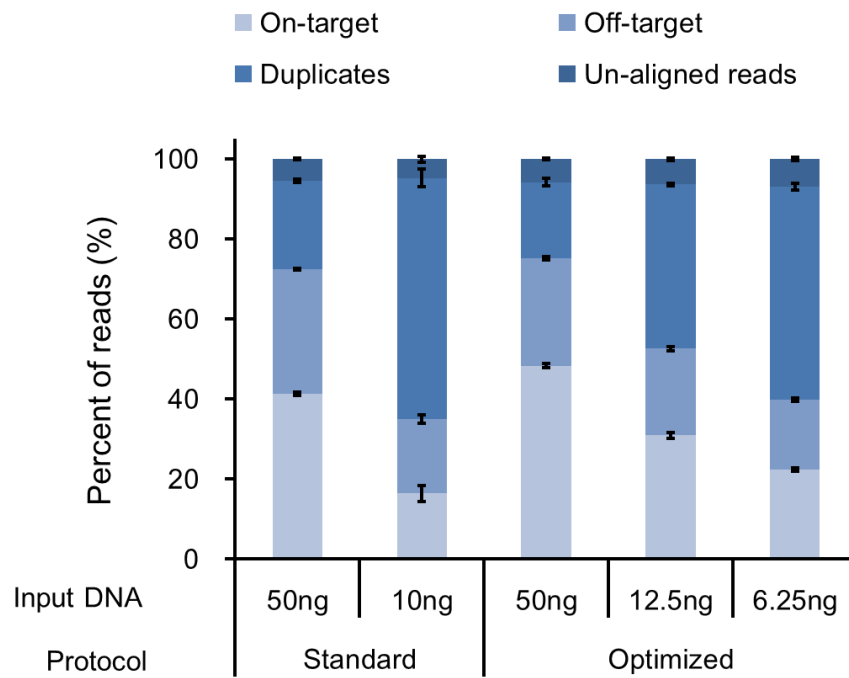

**Supplementary Figure S5** Comparison of sequencing metrics between the standard SureSelect-XT protocol and the optimized protocol. All sequencing data were down-sample from each raw fastq data to to a 1233× mean depth of coverage.

| Sample ID              | Normal HapMap cell line | Input amount (ng) | Library prep. platform | Total reads | Uniquely aligned reads | Fraction of uniquely aligned reads (%) | On target bases | Mean target coverage | Fraction target covered (> X100) |
|------------------------|-------------------------|-------------------|------------------------|-------------|------------------------|----------------------------------------|-----------------|----------------------|----------------------------------|
| NA07014                | NA07014                 | 200               | sureselect XT          | 48,352,684  | 46,562,322             | 96.30                                  | 2,487,356,303   | 1304                 | 0.99                             |
| NA10840                | NA10840                 | 200               | sureselect XT          | 49,638,362  | 47,819,422             | 96.34                                  | 2,574,029,359   | 1345                 | 0.99                             |
| NA18595                | NA18595                 | 200               | sureselect XT          | 50,405,332  | 48,594,669             | 96.41                                  | 2,579,061,025   | 1352                 | 0.99                             |
| NA18957                | NA18957                 | 200               | sureselect XT          | 47,576,932  | 45,731,451             | 96.12                                  | 2,427,594,243   | 1266                 | 0.99                             |
| NA18488                | NA18488                 | 200               | sureselect XT          | 59,276,564  | 56,157,007             | 94.74                                  | 2,801,088,033   | 1463                 | 0.99                             |
| NA18511                | NA18511                 | 200               | sureselect XT          | 48,107,532  | 46,153,978             | 95.94                                  | 2,434,581,315   | 1267                 | 0.99                             |
| NA18867                | NA18867                 | 200               | sureselect XT          | 48,849,822  | 46,720,701             | 95.64                                  | 2,409,818,907   | 1257                 | 0.99                             |
| NA18924                | NA18924                 | 200               | sureselect XT          | 50,522,710  | 48,086,917             | 95.18                                  | 2,505,624,571   | 1305                 | 0.99                             |
| NA19108                | NA19108                 | 200               | sureselect XT          | 49,303,908  | 47,071,648             | 95.47                                  | 2,437,246,533   | 1277                 | 0.99                             |
| NA19114                | NA19114                 | 200               | sureselect XT          | 48,784,804  | 46,766,020             | 95.86                                  | 2,493,151,449   | 1312                 | 0.99                             |
| XX_compare_sureXT_200  | XX group                | 200               | sureselect XT          | 49,002,072  | 46,975,306             | 95.86                                  | 2,458,996,331   | 1297                 | 0.99                             |
| XX_compare_sureXT_50   | XX group                | 50                | sureselect XT          | 44,286,772  | 41,833,230             | 94.46                                  | 1,420,047,016   | 718                  | 0.99                             |
| XX_compare_sureXT_10   | XX group                | 10                | sureselect XT          | 38,227,832  | 36,704,836             | 96.02                                  | 476,753,261     | 224                  | 0.98                             |
| XX_compare_sureQXT_200 | XX group                | 200               | sureselect QXT         | 48,262,080  | 45,909,443             | 95.13                                  | 419,998,162     | 172                  | 0.87                             |
| XX_compare_sureQXT_50  | XX group                | 50                | sureselect QXT         | 43,926,316  | 42,626,442             | 97.04                                  | 511,957,352     | 249                  | 0.96                             |
| XX_compare_sureQXT_10  | XX group                | 10                | sureselect QXT         | 44,591,342  | 42,911,450             | 96.23                                  | 342,645,331     | 151                  | 0.81                             |
| XX_compare_KAPA_200    | XX group                | 200               | KAPA Hyper             | 64,202,830  | 61,524,079             | 95.83                                  | 2,819,117,477   | 1481                 | 0.99                             |
| XX_compare_KAPA_50     | XX group                | 50                | KAPA Hyper             | 55,616,144  | 53,384,253             | 95.99                                  | 2,014,218,567   | 1038                 | 0.99                             |
| XX_compare_KAPA_10     | XX group                | 10                | KAPA Hyper             | 48,894,826  | 46,684,325             | 95.48                                  | 434,425,487     | 209                  | 0.97                             |
| XX_compare_Thru_200    | XX group                | 200               | Thruplex               | 53,715,794  | 48,589,658             | 90.46                                  | 969,042,998     | 586                  | 0.97                             |
| XX_compare_Thru_50     | XX group                | 50                | Thruplex               | 45,638,922  | 42,284,439             | 92.65                                  | 438,794,085     | 262                  | 0.95                             |
| XX_compare_Thru_10     | XX group                | 10                | Thruplex               | 51,282,602  | 47,207,106             | 92.05                                  | 77,440,153      | 45                   | 0.00                             |
| XX_compare_NEB_50      | XX group                | 50                | NEB ultra              | 59,350,050  | 54,345,772             | 91.57                                  | 579,342,078     | 348                  | 0.97                             |
| XX_compare_NEB_10      | XX group                | 10                | NEB ultra              | 60,346,910  | 53,685,808             | 88.96                                  | 90,377,513      | 52                   | 0.02                             |
| YY_compare_sureXT_200  | YY group                | 200               | sureselect XT          | 45,664,936  | 43,538,633             | 95.34                                  | 2,256,988,729   | 1178                 | 0.99                             |
| YY_compare_sureXT_50   | YY group                | 50                | sureselect XT          | 48,510,256  | 46,010,256             | 94.85                                  | 1,535,279,299   | 763                  | 0.99                             |
| YY_compare_sureXT_10   | YY group                | 10                | sureselect XT          | 39,562,812  | 37,405,592             | 94.55                                  | 366,113,421     | 167                  | 0.98                             |
| YY_compare_sureQXT_200 | YY group                | 200               | sureselect QXT         | 42,464,558  | 40,919,704             | 96.36                                  | 587,419,980     | 254                  | 0.95                             |
| YY_compare_sureQXT_50  | YY group                | 50                | sureselect QXT         | 48,824,386  | 46,339,998             | 94.91                                  | 451,898,878     | 183                  | 0.89                             |
| YY_compare_sureQXT_10  | YY group                | 10                | sureselect QXT         | 46,364,380  | 44,922,068             | 96.89                                  | 359,395,443     | 177                  | 0.89                             |
| YY_compare_KAPA_200    | YY group                | 200               | KAPA Hyper             | 56,771,114  | 54,528,806             | 96.05                                  | 2,555,966,895   | 1353                 | 0.99                             |
| YY_compare_KAPA_50     | YY group                | 50                | KAPA Hyper             | 49,765,362  | 47,679,828             | 95.81                                  | 1,899,327,651   | 999                  | 0.99                             |
| YY_compare_KAPA_10     | YY group                | 10                | KAPA Hyper             | 43,048,570  | 40,664,108             | 94.46                                  | 441,623,694     | 211                  | 0.97                             |
| YY_compare_Thru_200    | YY group                | 200               | Thruplex               | 58,175,184  | 52,152,482             | 89.65                                  | 901,079,165     | 543                  | 0.99                             |
| YY_compare_Thru_50     | YY group                | 50                | Thruplex               | 49,211,698  | 45,494,753             | 92.45                                  | 368,859,689     | 218                  | 0.99                             |
| YY_compare_Thru_10     | YY group                | 10                | Thruplex               | 48,364,886  | 44,775,966             | 92.58                                  | 117,079,456     | 68                   | 0.00                             |
| YY_compare_NEB_50      | YY group                | 50                | NEB ultra              | 59,669,474  | 55,202,407             | 92.51                                  | 653,386,008     | 394                  | 0.94                             |

## Supplementary Table S1

Summary of sequencing metrics for kit comparison using genomic DNAs from HapMap normal cell-lines.



| <b>Normal HapMap<br/>cell line</b> | <b>Number of<br/>homozygous base<br/>substitutions</b> | <b>Number of<br/>heterozygous base<br/>substitution</b> | <b>Sum</b> |
|------------------------------------|--------------------------------------------------------|---------------------------------------------------------|------------|
| NA07014                            | 532                                                    | 884                                                     | 1416       |
| NA10840                            | 517                                                    | 939                                                     | 1456       |
| NA18595                            | 456                                                    | 872                                                     | 1328       |
| NA18957                            | 556                                                    | 868                                                     | 1424       |
| NA18488                            | 674                                                    | 1153                                                    | 1827       |
| NA18511                            | 575                                                    | 1273                                                    | 1848       |
| NA18867                            | 603                                                    | 1199                                                    | 1802       |
| NA18924                            | 613                                                    | 997                                                     | 1610       |
| NA19108                            | 563                                                    | 1033                                                    | 1596       |
| NA19114                            | 561                                                    | 1280                                                    | 1841       |
| Total                              |                                                        |                                                         | 4840       |

**Supplementary Table S2**

Summary of cell-lines used for evaluation of base substitution detection.

| Sample ID      | FFPE ID | Input amount (ng) | Library prep. platform | Total reads | Uniquely aligned reads | Fraction of uniquely aligned reads (%) | On target bases | Mean target coverage | Fraction target covered (> X100) |
|----------------|---------|-------------------|------------------------|-------------|------------------------|----------------------------------------|-----------------|----------------------|----------------------------------|
| XX_XT_300_1    | FFPE1   | 300               | sureselect XT          | 53,719,180  | 45,732,754             | 85.13                                  | 1,314,625,370   | 1053                 | 0.99                             |
| XX_XT_300_2    | FFPE2   | 300               | sureselect XT          | 54,094,486  | 50,208,104             | 92.82                                  | 1,406,379,307   | 1127                 | 0.99                             |
| XX_XT_300_3    | FFPE3   | 300               | sureselect XT          | 53,696,836  | 45,276,926             | 84.32                                  | 1,065,405,986   | 853                  | 0.99                             |
| XX_XT_300_4    | FFPE4   | 300               | sureselect XT          | 50,676,414  | 43,701,920             | 86.24                                  | 535,946,951     | 429                  | 0.98                             |
| XX_XT_100_1    | FFPE1   | 100               | sureselect XT          | 56,940,584  | 49,053,657             | 86.15                                  | 1,172,374,138   | 939                  | 0.99                             |
| XX_XT_100_2    | FFPE2   | 100               | sureselect XT          | 60,892,264  | 53,844,471             | 88.43                                  | 1,047,794,555   | 839                  | 0.99                             |
| XX_XT_100_3    | FFPE3   | 100               | sureselect XT          | 51,570,722  | 44,729,758             | 86.73                                  | 644,522,338     | 516                  | 0.99                             |
| XX_XT_100_4    | FFPE4   | 100               | sureselect XT          | 50,139,156  | 44,492,070             | 88.74                                  | 250,794,810     | 201                  | 0.90                             |
| XX_XT_50_1     | FFPE1   | 50                | sureselect XT          | 60,086,136  | 56,034,567             | 93.26                                  | 786,766,976     | 631                  | 0.88                             |
| XX_XT_50_2     | FFPE2   | 50                | sureselect XT          | 50,089,236  | 44,919,034             | 89.68                                  | 637,094,670     | 510                  | 0.97                             |
| XX_XT_50_3     | FFPE3   | 50                | sureselect XT          | 47,795,532  | 42,097,401             | 88.08                                  | 300,603,254     | 241                  | 0.83                             |
| XX_XT_50_4     | FFPE4   | 50                | sureselect XT          | 39,348,630  | 35,169,686             | 89.38                                  | 107,769,760     | 86                   | 0.21                             |
| XX_HYPER_300_1 | FFPE1   | 300               | KAPA Hyper             | 50,420,226  | 45,980,193             | 91.19                                  | 1,389,027,755   | 1113                 | 0.99                             |
| XX_HYPER_300_2 | FFPE2   | 300               | KAPA Hyper             | 48,392,400  | 44,713,529             | 92.40                                  | 1,286,292,381   | 1030                 | 0.99                             |
| XX_HYPER_300_3 | FFPE3   | 300               | KAPA Hyper             | 57,445,352  | 53,235,162             | 92.67                                  | 1,182,335,950   | 947                  | 0.99                             |
| XX_HYPER_300_4 | FFPE4   | 300               | KAPA Hyper             | 49,339,714  | 46,512,500             | 94.27                                  | 696,742,899     | 558                  | 0.99                             |
| XX_HYPER_100_1 | FFPE1   | 100               | KAPA Hyper             | 46,799,174  | 43,893,933             | 93.79                                  | 993,931,395     | 796                  | 0.98                             |
| XX_HYPER_100_2 | FFPE2   | 100               | KAPA Hyper             | 47,768,526  | 45,242,763             | 94.71                                  | 893,368,521     | 716                  | 0.99                             |
| XX_HYPER_100_3 | FFPE3   | 100               | KAPA Hyper             | 51,530,230  | 49,177,954             | 95.44                                  | 574,702,007     | 461                  | 0.99                             |
| XX_HYPER_100_4 | FFPE4   | 100               | KAPA Hyper             | 48,791,226  | 46,554,043             | 95.41                                  | 291,200,353     | 233                  | 0.95                             |
| XX_HYPER_50_1  | FFPE1   | 50                | KAPA Hyper             | 20,719,948  | 19,620,172             | 94.69                                  | 388,650,101     | 312                  | 0.63                             |
| XX_HYPER_50_2  | FFPE2   | 50                | KAPA Hyper             | 51,156,084  | 48,387,325             | 94.59                                  | 589,792,088     | 473                  | 0.96                             |
| XX_HYPER_50_3  | FFPE3   | 50                | KAPA Hyper             | 47,301,696  | 44,038,004             | 93.10                                  | 352,063,267     | 282                  | 0.96                             |
| XX_HYPER_50_4  | FFPE4   | 50                | KAPA Hyper             | 42,620,024  | 40,376,488             | 94.74                                  | 142,837,029     | 115                  | 0.44                             |

### Supplementary Table S3

Summary of sequencing metrics for kit comparison using genomic DNAs from FFPE samples.

| Normal HapMap cell line | Number of background alleles in the control group | Number of background alleles in the test group |
|-------------------------|---------------------------------------------------|------------------------------------------------|
| NA07014                 | 1,404,712                                         | 694                                            |
| NA10840                 | 1,404,712                                         | 718                                            |
| NA18488                 | 1,404,712                                         | 619                                            |
| NA18511                 | 1,404,712                                         | 665                                            |
| NA18595                 | 1,404,712                                         | 733                                            |
| NA18867                 | 1,404,712                                         | 628                                            |
| NA18924                 | 1,404,712                                         | 661                                            |
| NA18957                 | 1,404,712                                         | 693                                            |
| Total                   | 1,404,712                                         | 5,411                                          |

#### Supplementary Table S4

Summary of cell lines used for the evaluation of cross-contamination.

| Sample ID           | Batch | Input amount (ng) | Total reads | Uniquely aligned reads | Fraction of uniquely aligned reads (%) | On target bases | Mean target coverage | Fraction target covered (> X100) |
|---------------------|-------|-------------------|-------------|------------------------|----------------------------------------|-----------------|----------------------|----------------------------------|
| XX_validate_625_1_1 | 1     | 6.25              | 25,503,752  | 23,529,657             | 92.26                                  | 329,384,796     | 264                  | 0.97                             |
| XX_validate_625_2_1 | 1     | 6.25              | 32,757,036  | 30,962,059             | 94.52                                  | 381,880,516     | 306                  | 0.98                             |
| XX_validate_125_1_1 | 1     | 12.5              | 46,090,736  | 42,658,526             | 92.55                                  | 583,201,362     | 467                  | 0.99                             |
| XX_validate_125_2_1 | 1     | 12.5              | 51,336,910  | 48,444,352             | 94.37                                  | 695,823,793     | 558                  | 0.99                             |
| XX_validate_25_1_1  | 1     | 25                | 62,332,428  | 58,278,619             | 93.5                                   | 1,070,930,451   | 858                  | 0.99                             |
| XX_validate_50_1_1  | 1     | 50                | 49,386,328  | 46,352,319             | 93.86                                  | 1,224,726,315   | 981                  | 0.99                             |
| XX_validate_100_1_1 | 1     | 100               | 57,965,906  | 54,372,852             | 93.8                                   | 1,638,722,430   | 1314                 | 0.99                             |
| XX_validate_200_1_1 | 1     | 200               | 63,301,576  | 58,771,851             | 92.84                                  | 1,895,208,844   | 1518                 | 0.99                             |
| XX_validate_625_1_2 | 2     | 6.25              | 38,207,212  | 35,892,598             | 93.94                                  | 375,596,047     | 301                  | 0.98                             |
| XX_validate_125_1_2 | 2     | 12.5              | 35,698,540  | 33,334,593             | 93.38                                  | 578,129,664     | 463                  | 0.98                             |
| XX_validate_25_1_2  | 2     | 25                | 50,695,312  | 47,590,815             | 93.88                                  | 970,966,852     | 778                  | 0.99                             |
| XX_validate_50_1_2  | 2     | 50                | 48,845,446  | 45,950,152             | 94.07                                  | 1,248,398,183   | 1001                 | 0.99                             |
| XX_validate_100_1_2 | 2     | 10                | 52,410,880  | 49,527,535             | 94.5                                   | 1,512,821,555   | 1212                 | 0.99                             |
| XX_validate_200_1_2 | 2     | 200               | 60,824,058  | 57,528,645             | 94.58                                  | 1,883,373,314   | 1509                 | 0.99                             |
| XX_validate_125_1_3 | 3     | 12.5              | 54,959,488  | 51,920,625             | 94.47                                  | 806,989,300     | 489                  | 0.99                             |
| XX_validate_25_1_3  | 3     | 25                | 57,041,342  | 54,222,622             | 95.06                                  | 1,272,918,856   | 777                  | 0.99                             |
| XX_validate_50_1_3  | 3     | 50                | 46,392,896  | 43,828,500             | 94.47                                  | 1,472,671,766   | 906                  | 0.99                             |
| XX_validate_100_1_3 | 3     | 10                | 64,769,486  | 61,465,926             | 94.9                                   | 2,175,834,535   | 1334                 | 0.99                             |
| XX_validate_200_1_3 | 3     | 200               | 70,602,794  | 66,983,608             | 94.87                                  | 1,957,733,515   | 1569                 | 0.99                             |
| XX_validate_625_1_4 | 4     | 6.25              | 29,460,350  | 27,357,049             | 92.86                                  | 336,804,027     | 270                  | 0.95                             |
| XX_validate_125_1_4 | 4     | 12.5              | 44,985,596  | 42,030,261             | 93.43                                  | 794,283,457     | 482                  | 0.98                             |
| XX_validate_50_1_4  | 4     | 50                | 61,214,202  | 57,873,418             | 94.54                                  | 1,928,443,680   | 1186                 | 0.99                             |
| XX_validate_100_1_4 | 4     | 10                | 58,125,254  | 54,464,376             | 93.7                                   | 2,015,663,221   | 1244                 | 0.99                             |
| XX_validate_200_1_4 | 4     | 200               | 68,888,004  | 65,222,669             | 94.68                                  | 2,579,360,965   | 1589                 | 0.99                             |

### Supplementary Table S5

Summary of sequencing metrics for the performance evaluation for SNV detection sensitivity using the optimized protocol.

| Tumor cell line | Gene          | Indel type               | Indel length (bp) | Measured mutant allele frequency | Genomic coordinates (hg19) | Reference sequence | Alternate sequence                    |
|-----------------|---------------|--------------------------|-------------------|----------------------------------|----------------------------|--------------------|---------------------------------------|
| A549            | <i>SMO</i>    | non-frameshift insertion | 3                 | 0.2381                           | chr7:128829039             | -                  | GCT                                   |
| CCRF-CEM        | <i>HNFI1A</i> | frameshift deletion      | 1                 | 0.1134                           | chr12:121432115            | G                  | -                                     |
|                 | <i>NOTCH1</i> | non-frameshift insertion | 36                | 0.2468                           | chr9:139399362             | -                  | GCAGGAAGTGAAGGAGC<br>TGTTGTGGGAAGCGCG |
| HCT-15          | <i>APC</i>    | frameshift deletion      | 1                 | 0.447                            | chr5:112175539             | C                  | -                                     |
|                 | <i>BRCA2</i>  | frameshift deletion      | 2                 | 0.31                             | chr13:32912090             | TG                 | -                                     |
| NCI-H128        | <i>ARID1A</i> | frameshift deletion      | 1                 | 0.285                            | chr1:27092811              | G                  | -                                     |
|                 | <i>RB1</i>    | frameshift deletion      | 1                 | 0.4776                           | chr13:48951087             | A                  | -                                     |
| NCI-H727        | <i>IDH2</i>   | frameshift substitution  | 1                 | 0.3122                           | chr15:90631943             | CCAT               | CAA                                   |
|                 | <i>TP53</i>   | non-frameshift insertion | 9                 | 0.1216                           | chr17:7578434              | -                  | ACTGCTTGT                             |
| SW48            | <i>ARID1A</i> | frameshift deletion      | 1                 | 0.3347                           | chr1:27023904              | G                  | -                                     |
|                 | <i>ARID1A</i> | frameshift deletion      | 1                 | 0.3327                           | chr1:27101402              | C                  | -                                     |
|                 | <i>ARID1B</i> | non-frameshift deletion  | 3                 | 0.25                             | chr6:157099982             | GGC                | -                                     |
|                 | <i>ATRX</i>   | frameshift deletion      | 2                 | 0.3231                           | chrX:76938089              | TC                 | -                                     |
|                 | <i>BRCA2</i>  | frameshift deletion      | 1                 | 0.3051                           | chr13:32913559             | A                  | -                                     |
|                 | <i>BRCA2</i>  | frameshift deletion      | 1                 | 0.3104                           | chr13:32913837             | A                  | -                                     |
|                 | <i>EZH2</i>   | frameshift deletion      | 1                 | 0.2217                           | chr7:148515025             | C                  | -                                     |
|                 | <i>FBXW7</i>  | frameshift deletion      | 1                 | 0.2975                           | chr4:153244156             | C                  | -                                     |
|                 | <i>FGFR3</i>  | frameshift deletion      | 1                 | 0.2857                           | chr4:1801138               | G                  | -                                     |
|                 | <i>NTRK1</i>  | frameshift deletion      | 1                 | 0.3264                           | chr1:156846308             | C                  | -                                     |
|                 | <i>PTCH1</i>  | frameshift deletion      | 1                 | 0.3193                           | chr9:98211549              | G                  | -                                     |
|                 | <i>SMO</i>    | frameshift deletion      | 1                 | 0.3812                           | chr7:128852004             | C                  | -                                     |
| TUR             | <i>PTEN</i>   | frameshift insertion     | 4                 | 0.9388                           | chr10:89692903             | -                  | CGCC                                  |
| RL95-2          | <i>ARID1A</i> | frameshift deletion      | 1                 | 0.3091                           | chr1:27087373              | C                  | -                                     |
|                 | <i>ARID1B</i> | frameshift deletion      | 1                 | 0.3051                           | chr6:157405954             | G                  | -                                     |
|                 | <i>ARID1B</i> | non-frameshift insertion | 3                 | 0.4407                           | chr6:157100396             | -                  | CGC                                   |
|                 | <i>ATM</i>    | frameshift deletion      | 1                 | 0.3036                           | chr11:108172510            | A                  | -                                     |
|                 | <i>BRAF</i>   | frameshift deletion      | 1                 | 0.3041                           | chr7:140482927             | G                  | -                                     |
|                 | <i>BRCA2</i>  | frameshift insertion     | 1                 | 0.3031                           | chr13:32913952             | -                  | A                                     |
|                 | <i>BRCA2</i>  | frameshift insertion     | 1                 | 0.3119                           | chr13:32912770             | -                  | T                                     |
|                 | <i>JAK1</i>   | frameshift deletion      | 1                 | 0.3001                           | chr1:65305357              | T                  | -                                     |
|                 | <i>JAK1</i>   | frameshift deletion      | 1                 | 0.3115                           | chr1:65306997              | T                  | -                                     |
|                 | <i>NTRK1</i>  | frameshift insertion     | 1                 | 0.2966                           | chr1:156848967             | -                  | C                                     |
|                 | <i>PTEN</i>   | frameshift insertion     | 1                 | 0.3122                           | chr10:89720811             | -                  | A                                     |
|                 | <i>PTEN</i>   | frameshift deletion      | 1                 | 0.3102                           | chr10:89720812             | A                  | -                                     |
|                 | <i>TP53</i>   | non-frameshift deletion  | 3                 | 0.4602                           | chr17:7578195              | CAC                | -                                     |

### Supplementary Table S6a

Summary of tumor cell lines and indel variants used for the evaluation of indel detection. NCI-H146 and THP-1 were not listed in the table because they did not have any indel variants verified in sequence data.

Pool of ten cell lines: pool A

|          |          |        |          |          |
|----------|----------|--------|----------|----------|
| A549     | CCRF-CEM | HCT-15 | NCI-H128 | NCI-H146 |
| NCI-H727 | SW48     | THP-1  | TUR      | RL95-2   |

Pools of five cell lines (1): pool B

|      |          |        |          |          |
|------|----------|--------|----------|----------|
| A549 | CCRF-CEM | HCT-15 | NCI-H128 | NCI-H146 |
|------|----------|--------|----------|----------|

Pools of five cell lines (2): pool C

|          |      |       |     |        |
|----------|------|-------|-----|--------|
| NCI-H727 | SW48 | THP-1 | TUR | RL95-2 |
|----------|------|-------|-----|--------|

### Supplementary Table S6b

Summary of tumor cell line pools used for the evaluation of indel detection

| Sample ID         | Input amount (ng) | Total reads | Uniquely aligned reads | Fraction of uniquely aligned reads (%) | On target bases | Mean target coverage | Fraction target covered (> X100) |
|-------------------|-------------------|-------------|------------------------|----------------------------------------|-----------------|----------------------|----------------------------------|
| InDel_group_A_200 | 200               | 48,970,062  | 46,596,599             | 95.15                                  | 1,643,589,721   | 1318                 | 0.99                             |
| InDel_group_B_200 | 200               | 43,054,566  | 41,096,524             | 95.45                                  | 1,446,541,437   | 1160                 | 0.99                             |
| InDel_group_C_200 | 200               | 51,010,360  | 48,228,285             | 94.55                                  | 1,688,905,376   | 1353                 | 0.99                             |
| InDel_group_A_100 | 100               | 40,752,556  | 38,724,456             | 95.02                                  | 1,317,464,670   | 1056                 | 0.99                             |
| InDel_group_B_100 | 100               | 57,715,312  | 54,372,947             | 94.21                                  | 1,694,971,205   | 1358                 | 0.99                             |
| InDel_group_C_100 | 100               | 44,248,304  | 41,946,152             | 94.8                                   | 1,404,055,162   | 1125                 | 0.99                             |
| InDel_group_A_50  | 50                | 54,723,632  | 51,664,046             | 94.41                                  | 1,363,927,746   | 1093                 | 0.99                             |
| InDel_group_B_50  | 50                | 51,858,072  | 48,723,648             | 93.96                                  | 1,308,315,347   | 1049                 | 0.99                             |
| InDel_group_C_50  | 50                | 60,249,092  | 56,616,241             | 93.97                                  | 1,484,658,608   | 1190                 | 0.99                             |
| InDel_group_A_25  | 25                | 54,771,886  | 51,426,025             | 93.89                                  | 1,124,183,380   | 901                  | 0.99                             |
| InDel_group_B_25  | 25                | 57,665,264  | 53,523,905             | 92.82                                  | 1,073,595,129   | 860                  | 0.99                             |
| InDel_group_C_25  | 25                | 54,981,408  | 51,667,676             | 93.97                                  | 1,103,008,974   | 884                  | 0.99                             |

### Supplementary Table S7

Summary of sequencing metrics for the performance evaluation for indel detection sensitivity using the optimized protocol.
